# Supplementary material
Source: PubMed Central journal article supplement (PMC7366091)

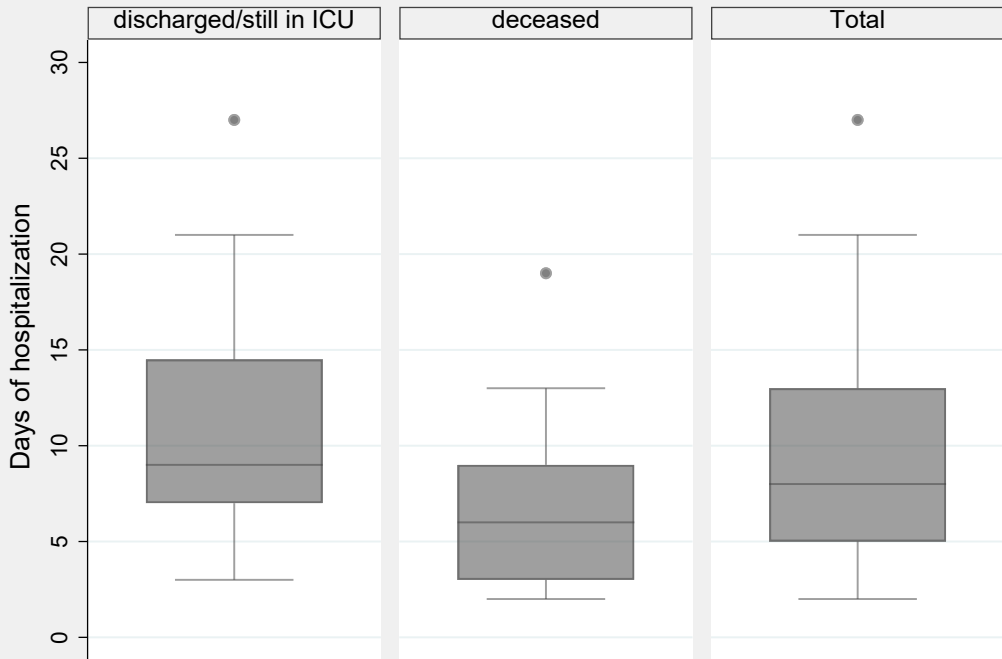

Days of hospitalization in relation to outcomes,  $p=0.002$

Supplement: mmc2.pdf [file mmc2.pdf]

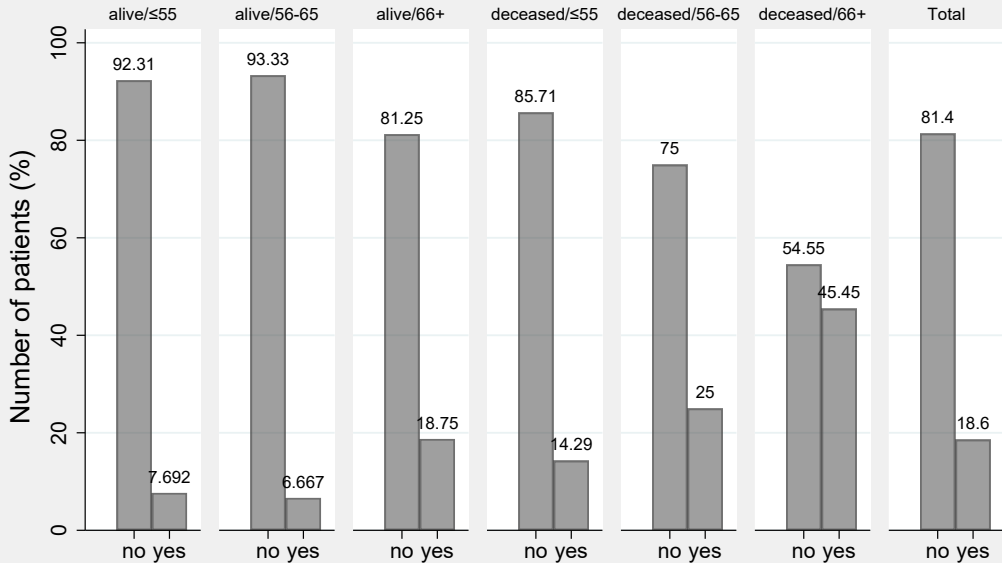

Diabetes Outcomes in relation to age,  $p=0.038$

Supplement: mmc3.pdf [file mmc3.pdf]
